# Supplementary material for: Assessment of evolution and risks of glacier lake outbursts in the Djungarskiy Alatau, Central Asia, using Landsat imagery and glacier bed topography modelling
Source: Copernicus journal article supplement (doi:10.5194/nhess-17-1837-2017), 2017-10-24
Supplement: Supplementary file 2 [file nhess-17-1837-2017-supplement.zip]

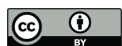

## *Supplement of*

# **Assessment of evolution and risks of glacier lake outbursts in the Djungarskiy Alatau, Central Asia, using Landsat imagery and glacier bed topography modelling**

**Vassiliy Kapitsa et al.**

*Correspondence to:* Maria Shahgedanova ([m.shahgedanova@reading.ac.uk](mailto:m.shahgedanova@reading.ac.uk)) and Vassiliy Kapitsa ([vasil.geo@mail.ru](mailto:vasil.geo@mail.ru))

- [nhess-17-1837-2017-supplement-title-page.pdf](#)
- [Kapitsa et al\\_nhess\\_2017\\_134\\_Supplement 1.pdf](#)
- [Kapitsa et al\\_nhess\\_2017\\_134\\_Supplement 2.pdf](#)
- [Kapitsa et al\\_nhess\\_2017\\_134\\_Supplement 3.pdf](#)

The copyright of individual parts of the supplement might differ from the CC BY 3.0 License.
